# Supplementary material for: A new software toolkit for optical apportionment of carbonaceous aerosol
Source: Copernicus journal article supplement (doi:10.5194/egusphere-2023-1936), 2023-10-11
Supplement: Supplementary file [file egusphere-2023-1936-AC1-supplement.pdf]

## Answers to RC2

### General Comments:

The manuscript by Tommaso Isolabella et al. presented an upgrade to the Multi-Wavelength Absorbance Analyzer optical apportionment model. In addition to the apportionment of the absorption coefficient  $b_{\text{abs}}$  in its components and sources, the extended model allows the retrieval of the Absorption Ångström Exponent of each component and source, thereby avoiding initial assumptions regarding these parameters. The deployment and application of this improved model toolkit holds some technical value. Overall, the topic fits well within the scope of AMT. Before its publication, the following comments need to be addressed.

We would like to thank the referee for the time she/he invested in reviewing our article, and for the stimulating comments and precious suggestions.

### Specific Comments:

The parameter value for  $\alpha_{\text{WB}}$  varied from 1.94 (1.64) to 2.06 (1.76) in Fig. 3. Please explain the reasons for choosing these ranges here. In addition, is there any specific reason that you used 0.02 as the interval in Fig. 3? The uncertainties caused by choosing different interval values and the ranges of parameter value for  $\alpha_{\text{WB}}$  should be evaluated. Please elaborate.

Thank you for pointing this out. We propose to add a clarification in the caption to Fig. 3, reporting: *“The plots are shown only for the last iteration of the preprocessing step.”*

The plots refer only to the last preprocessing iteration. To elaborate on the matter, the ranges for each  $\alpha$  parameter are updated dynamically at each iteration of the preprocessing stage. The default starting ranges for  $\alpha_{\text{FF}}$  and  $\alpha_{\text{BC}}$  are set as [0.8, 1.2], and for  $\alpha_{\text{WB}}$ , it is [1.8, 2.2], each with a step size of 0.1. After each iteration, the new best triplet for  $\alpha_{\text{WB}}$ ,  $\alpha_{\text{FF}}$  and  $\alpha_{\text{BC}}$  is found, a new (narrower) range is computed around each of the best values for the new alphas, and a new (smaller) step size is chosen. For instance, let's assume the first iteration results in the triplet (0.9, 0.8, 2.0). Then the new search intervals will be [0.80, 1.00], [0.70, 0.90], [1.90, 2.10] and the new step size will be 0.05. The process continues for all the subsequent iterations.

Following the advice of the referee, we propose to add the following lines starting from line 210: *“Through the sensitivity tests we performed on the preprocessing step, we discovered that the apportioned optical absorption coefficients can vary by up to 10% by adjusting the values of the  $\alpha$  parameters within their uncertainty brackets. We estimated the uncertainty of the  $\alpha$  parameters by considering the steepness of the  $R^2$  vs.  $\alpha$  curves. The curve of  $\alpha_{\text{FF}}$  is very steep, which led us to estimate an uncertainty of 0.02, whereas the  $R^2$  vs  $\alpha$  curves for the other two parameters were flatter, indicating a larger uncertainty for these parameters.”*

The authors assumed that the absorption coefficient is decomposed into contributions from fossil fuel and wood burning, and that BrC is only produced by wood burning (Line 93-95). The authors need to address such uncertainties in the revised manuscript. In addition, such uncertainties should be evaluated at the different campaigns due to different primary emissions.

We appreciate this comment; we propose to remove the simplifying assumption made in line 92, which only considered WB as the source of BrC. In general, BrC can have other sources (see for example [1]). Furthermore, atmospheric mixing and processing can alter its optical properties over time. Therefore, the amount of BrC in the sample may be underestimated. Our model searches for an aerosol component *with the optical properties* of BrC (i.e. a high AAE); how much of it is actually BrC depends on a number of factors. The correlation between BrC and levoglucosan concentration is a good indicator of wood being the main

source of BrC. If the correlation is low, the model may have found BrC from other sources than WB, or the BrC produced via WB may have degraded through atmospheric aging and now exhibits different optical properties. For example, in Milan, where there are multiple sources of carbonaceous aerosol, the model struggles to distinguish between the sources. Thus, the correlation between the apportioned coefficients in Milan and the concentration of levoglucosan (Fig. 2, black triangles and Table 1) is lower than in Propata ( $R^2=0.82$ ), indicating that the model retrieves only a part of the emissions due to wood burning in the urban site. We revised the final part of the conclusion, and in particular we propose to add the following consideration at line 305: *“We would like to underline that the Milan case study is to be considered as a stress test of our algorithm: the context is very complex due to the presence of a large number of sources such as traffic, biomass combustion, industry, etc., in a city with over 1.3 million inhabitants. The city is also subject to major regional transport events, high PM concentrations (average PM10 value during the campaign of  $68.3 \pm 25.6 \mu\text{g m}^{-3}$ ) and air stagnation conditions resulting in a high level of aerosol reprocessing. On the other hand, when it comes to the Propata dataset, the correlation with levoglucosan is much higher ( $R^2=0.96$ ), indicating that within the experimental uncertainties the assumption that BrC is only produced by WB is satisfied.”*

Last, it is possible that the assumption of two-component apportionment is not suitable at the sampling site due to the poor correlation between BrC and levoglucosan. This could be due to the role of some types of mineral dust in light absorption. However, it is important to note that the impact of mineral dust can usually be considered negligible at our latitudes since it occurs only occasionally and for very limited periods.

The authors compared the Propata campaign and Milan campaign datasets to verify whether the particulate sampled in a rural area has a different optical behavior than the aerosol sampled in an urban area. However, the comparisons have not been deeply discussed throughout this manuscript. For example, the differences between BrC and BC<sub>WB</sub> are similar across all sampling time in Propata, but the differences vary at different periods in Milan. Please elaborate.

The goal of this work is to compare the optical behaviour of the aerosol in the urban and rural with the objective of carrying out an optical apportionment. The apportionment model aims to establish a correlation between the aerosol composition and its sources based on its particular optical behaviour. As already mentioned, as for the different correlation between BrC and BC<sub>WB</sub> in Propata and in Milan, the discrepancy is because the aerosol in Propata is mostly primary and therefore the BrC found in this site is mainly due to WB. For this reason, BrC and BC<sub>WB</sub> in Propata correlate very well between each other, and with the levoglucosan concentration. On the contrary, the aerosol in Milan is heavily reprocessed, resulting in a weaker correlation.

In Section 4, a brief description of the Propata campaign and Milan campaign (including PM mass concentrations, composition, and sources) would be good. Otherwise, we don't know the general characterization of the two campaigns.

A description of both measurement campaigns has already been presented in the paper Bernardoni et al., 2017. Actually, no information on PM composition is available except Levoglucosan concentrations; in consideration of the referee's suggestion, we decided to add in the text the average value of the PM concentration at both sites. At line 176 we propose to add a sentence as follows: *“No information on chemical speciation (except Levoglucosan) was available at the two sites; the average PM10 concentration measured at Propata and Milan was  $8.3 \pm 6.0 \mu\text{g m}^{-3}$  and  $68.3 \pm 25.6 \mu\text{g m}^{-3}$ , respectively”.*

## References

- [1] Corbin, J. C. et al. (2018). *Brown and black carbon emitted by a marine engine operated on heavy fuel oil and distillate fuels: Optical properties, size distributions, and emission factors*, Journal of Geophysical Research: Atmospheres, 123, <https://doi.org/10.1029/2017JD027818>
- [2] Bernardoni, V., Pileci, R. E., Caponi, L., Massabò D. (2017): The Multi-Wavelength Absorption Analyzer (MWAA) Model as a Tool for Source and Component Apportionment Based on Aerosol Absorption Properties: Application to Samples Collected in Different Environments, Atmosphere, 8(11), :218, <https://doi.org/10.3390/atmos8110218>, 2017.
